# Supplementary material for: Epigenetic and genetic dissections of UV-induced global gene dysregulation in skin cells through multi-omics analyses
Source: PubMed Central journal article supplement (PMC5314319; doi:10.1038/srep42646), 2017-02-17
Supplement: srep42646-s1.pdf [file srep42646-s1.pdf]

## **Supplementary Information**

### **Epigenetic and genetic dissections of UV-induced global gene dysregulation in skin cells through multi-omics analyses**

Yao Shen<sup>1</sup>, Milda Stanislaukas<sup>2</sup>, Gen Li<sup>3</sup>, Deyou Zheng<sup>4,5</sup>, and Liang Liu<sup>2\*</sup>

Departments of Systems Biology<sup>1</sup>, Dermatology<sup>2</sup>, Biostatistics<sup>3</sup>, Columbia University, New York, NY, USA; Departments of Genetics<sup>4</sup> and Neurology<sup>5</sup>, Albert Einstein College of Medicine, New York, NY, USA.

**Supplemental Table 1.** Genes associated with UV-induced SNV mutations at 4h after

UVR

| gene     | chromosome | position  | locations | frequency   | control | UV-4h |
|----------|------------|-----------|-----------|-------------|---------|-------|
| ZBTB2    | chr6       | 151712026 | intron    | 0.818181818 | G       | A     |
| FAM20C   | chr7       | 205301    | intron    | 0.8         | A       | G     |
| CDC16    | chr13      | 115000650 | intron    | 0.797752809 | G       | T     |
| ASGR2    | chr17      | 7004129   | down1000  | 0.75        | A       | C     |
| HPCA     | chr1       | 33358601  | intron    | 0.727272727 | G       | C     |
| GNB5     | chr15      | 52471606  | intron    | 0.727272727 | C       | A     |
| RBFOX1   | chr16      | 6771873   | intron    | 0.714285714 | G       | A     |
| KCNQ2    | chr20      | 62070160  | intron    | 0.714285714 | C       | G     |
| USP54    | chr10      | 75289244  | 3utr      | 0.7         | G       | C     |
| DENND5B  | chr12      | 31743344  | 5utr      | 0.7         | A       | G     |
| EZR-AS1  | chr6       | 159239703 | intron    | 0.7         | G       | C     |
| EZR      | chr6       | 159239703 | intron    | 0.7         | G       | C     |
| AK4      | chr1       | 65614318  | intron    | 0.689655172 | A       | G     |
| GPD2     | chr2       | 157308278 | intron    | 0.666666667 | A       | G     |
| ZNF229   | chr19      | 44934653  | codeexon  | 0.647058824 | T       | C     |
| AGXT2L2  | chr5       | 177659624 | 5utr      | 0.64        | C       | A     |
| IPP      | chr1       | 46191095  | intron    | 0.636363636 | G       | C     |
| GCSH     | chr16      | 81129822  | codeexon  | 0.636363636 | G       | A     |
| IRX4     | chr5       | 1881733   | intron    | 0.633333333 | T       | C     |
| SPATA6   | chr1       | 48901495  | intron    | 0.620689655 | C       | T     |
| TDRD10   | chr1       | 154474875 | 5utr      | 0.6         | G       | A     |
| EFNA5    | chr5       | 106830063 | intron    | 0.6         | C       | T     |
| AK309476 | chr9       | 99984349  | intron    | 0.6         | A       | G     |
| CYP24A1  | chr20      | 52782438  | intron    | 0.583333333 | T       | G     |
| AK027541 | chr2       | 162101549 | intron    | 0.583333333 | G       | A     |
| AKNA     | chr9       | 117107006 | intron    | 0.583333333 | A       | T     |
| SLC18A3  | chr10      | 50818500  | 5utr      | 0.571428571 | G       | T     |
| FLG      | chr1       | 152280864 | codeexon  | 0.571428571 | A       | G     |
| FAM161A  | chr2       | 62073918  | 5utr      | 0.571428571 | C       | T     |
| RAC2     | chr22      | 37629567  | intron    | 0.555555556 | C       | T     |
| H1FO     | chr22      | 38201283  | 5utr      | 0.555555556 | A       | G     |
| ISPD     | chr7       | 16460893  | codeexon  | 0.550724638 | T       | G     |
| WDR5     | chr9       | 137001593 | intron    | 0.55        | C       | G     |
| ANAPC16  | chr10      | 73847739  | intron    | 0.545454545 | T       | C     |
| SPOCK2   | chr10      | 73847739  | intron    | 0.545454545 | T       | C     |
| ROCK1P1  | chr18      | 109366    | 3utr      | 0.545454545 | C       | A     |
| ALLC     | chr2       | 3751091   | down1000  | 0.541666667 | A       | C     |
| SLC24A3  | chr20      | 19658947  | intron    | 0.538461538 | A       | C     |
| SLC24A3  | chr20      | 19658963  | intron    | 0.538461538 | G       | A     |

|            |       |           |          |             |   |   |
|------------|-------|-----------|----------|-------------|---|---|
| ERBB4      | chr2  | 212389372 | intron   | 0.538461538 | C | T |
| MAP6D1     | chr3  | 183535094 | 3utr     | 0.533333333 | C | T |
| NDFIP1     | chr5  | 141488364 | 5utr     | 0.533333333 | G | C |
| ADAMTS2    | chr5  | 178548136 | intron   | 0.523809524 | C | T |
| SMARCB1    | chr22 | 24129129  | up1000   | 0.52        | G | T |
| AK056396   | chr1  | 143153082 | intron   | 0.5         | T | A |
| CR936796   | chr1  | 143153082 | intron   | 0.5         | T | A |
| JMJD4      | chr1  | 227920103 | codeexon | 0.5         | G | A |
| USP44      | chr12 | 95937991  | intron   | 0.5         | C | T |
| SLC39A2    | chr14 | 21469151  | codeexon | 0.5         | T | C |
| VASH1      | chr14 | 77227819  | up1000   | 0.5         | T | G |
| DQ588973   | chr15 | 31089893  | up1000   | 0.5         | T | A |
| FAM63B     | chr15 | 59144199  | intron   | 0.5         | A | G |
| LOC643542  | chr18 | 65498815  | intron   | 0.5         | G | A |
| COL5A3     | chr19 | 10120887  | intron   | 0.5         | C | G |
| RGPD4      | chr2  | 108444567 | intron   | 0.5         | G | A |
| SYNJ2      | chr6  | 158512154 | intron   | 0.5         | C | G |
| STK31      | chr7  | 23787138  | intron   | 0.5         | G | A |
| DDC        | chr7  | 50527782  | intron   | 0.5         | G | A |
| SEMA3C     | chr7  | 80378319  | codeexon | 0.5         | G | C |
| IFNA4      | chr9  | 21187121  | codeexon | 0.5         | T | A |
| GLRX3      | chr10 | 131934654 | 5utr     | 0.492063492 | C | G |
| RANBP17    | chr5  | 170288922 | 5utr     | 0.487179487 | A | G |
| AHNAK2     | chr14 | 105411781 | codeexon | 0.473684211 | G | A |
| INPP1      | chr2  | 191208341 | 5utr     | 0.473684211 | C | T |
| COL6A2     | chr21 | 47517796  | up1000   | 0.470588235 | C | G |
| RNF8       | chr6  | 37348920  | intron   | 0.466666667 | C | T |
| CCDC146    | chr7  | 76924216  | 3utr     | 0.466666667 | A | G |
| MIR548H4   | chr15 | 69256665  | intron   | 0.461538462 | C | T |
| NOX5       | chr15 | 69256665  | intron   | 0.461538462 | C | T |
| C1orf43    | chr1  | 154187808 | intron   | 0.454545455 | C | T |
| CSPG4      | chr15 | 75979782  | codeexon | 0.454545455 | G | T |
| LRRC37A11P | chr17 | 37202489  | intron   | 0.454545455 | T | C |
| CERK       | chr22 | 47083010  | 3utr     | 0.454545455 | T | C |
| CERK       | chr22 | 47083012  | 3utr     | 0.454545455 | T | A |
| TMEM214    | chr2  | 27259794  | intron   | 0.454545455 | G | A |
| ANK2       | chr4  | 114037858 | intron   | 0.454545455 | A | G |
| GIGYF1     | chr7  | 100284593 | intron   | 0.45        | C | T |
| DNAH11     | chr7  | 21901566  | codeexon | 0.45        | T | C |
| WAPAL      | chr10 | 88230874  | intron   | 0.444444444 | G | A |
| C1orf168   | chr1  | 57221558  | intron   | 0.444444444 | A | G |
| REXO1      | chr19 | 1848628   | up1000   | 0.444444444 | A | G |
| CDHR3      | chr7  | 105596532 | intron   | 0.444444444 | A | C |
| NUTM1      | chr15 | 34638198  | codeexon | 0.4375      | A | G |

|              |       |           |          |             |   |   |
|--------------|-------|-----------|----------|-------------|---|---|
| BTNL9        | chr5  | 180486247 | codeexon | 0.432989691 | G | T |
| IQCK         | chr16 | 19838260  | intron   | 0.428571429 | G | A |
| DNAH1        | chr3  | 52407725  | intron   | 0.428571429 | C | T |
| TLN2         | chr15 | 63047778  | codeexon | 0.421052632 | C | T |
| SPCS2        | chr11 | 74660356  | codeexon | 0.419354839 | G | A |
| MSS51        | chr10 | 75186612  | intron   | 0.416666667 | G | C |
| DNAJC3       | chr13 | 96343004  | intron   | 0.416666667 | G | A |
| NOL9         | chr1  | 6591937   | intron   | 0.416666667 | T | C |
| MTOR         | chr1  | 11190051  | intron   | 0.411764706 | A | T |
| EIF2S1       | chr14 | 67849139  | intron   | 0.411764706 | A | T |
| OCEL1        | chr19 | 17338099  | intron   | 0.411764706 | G | C |
| GPR125       | chr4  | 22439914  | codeexon | 0.411764706 | A | C |
| LOC401127    | chr4  | 39482627  | 3utr     | 0.411764706 | T | C |
| PRKXP1       | chr15 | 101099378 | codeexon | 0.409090909 | C | T |
| RBM20        | chr10 | 112526712 | intron   | 0.4         | G | C |
| PHYH         | chr10 | 13331412  | intron   | 0.4         | G | A |
| BC019904     | chr11 | 2383401   | intron   | 0.4         | G | A |
| SCYL3        | chr1  | 169862793 | intron   | 0.4         | G | A |
| PADI1        | chr1  | 17557039  | intron   | 0.4         | T | C |
| EIF4G3       | chr1  | 21163881  | intron   | 0.4         | C | T |
| HBA1         | chr16 | 226331    | up1000   | 0.4         | G | A |
| CFDP1        | chr16 | 75409474  | intron   | 0.4         | C | G |
| CCDC57       | chr17 | 80108120  | intron   | 0.4         | C | T |
| POLR3F       | chr20 | 18460641  | intron   | 0.4         | G | A |
| C20orf201    | chr20 | 62715089  | intron   | 0.4         | G | A |
| OPRL1        | chr20 | 62715089  | intron   | 0.4         | G | A |
| FBXW4P1      | chr22 | 23605114  | 5utr     | 0.4         | C | A |
| HTR3E        | chr3  | 183819155 | intron   | 0.4         | T | C |
| PRRT3        | chr3  | 9990800   | codeexon | 0.4         | G | C |
| PTPRD        | chr9  | 10060823  | intron   | 0.4         | T | C |
| PTPRD        | chr9  | 10060827  | intron   | 0.4         | T | C |
| CXCL12       | chr10 | 44874216  | intron   | 0.384615385 | G | A |
| RCBTB2       | chr13 | 49096022  | intron   | 0.384615385 | T | C |
| HSP90AA1     | chr14 | 102553255 | intron   | 0.384615385 | C | T |
| ZFAND6       | chr15 | 80352332  | intron   | 0.384615385 | G | T |
| LOC284395    | chr19 | 29986347  | intron   | 0.384615385 | A | C |
| LONRF2       | chr2  | 100938917 | 5utr     | 0.384615385 | G | C |
| HSPBAP1      | chr3  | 122499441 | intron   | 0.384615385 | G | A |
| CAMK2D       | chr4  | 114682714 | 5utr     | 0.384615385 | G | A |
| PLAC9        | chr10 | 81892696  | intron   | 0.381818182 | C | G |
| OR7E12P      | chr11 | 3412900   | codeexon | 0.375       | T | C |
| CYP4A22      | chr1  | 47609407  | intron   | 0.375       | C | T |
| LOC100271836 | chr16 | 21513372  | intron   | 0.375       | T | C |
| LOC23117     | chr16 | 21513372  | intron   | 0.375       | T | C |

|             |       |           |          |             |   |   |
|-------------|-------|-----------|----------|-------------|---|---|
| TPM3P9      | chr19 | 53945679  | 3utr     | 0.375       | T | G |
| BTNL9       | chr5  | 180486224 | intron   | 0.369230769 | T | G |
| PCSK7       | chr11 | 117102706 | intron   | 0.368421053 | C | G |
| DMBT1       | chr10 | 124349692 | intron   | 0.363636364 | A | T |
| LDLRAD3     | chr11 | 35990164  | intron   | 0.363636364 | C | T |
| BC070093    | chr11 | 83097971  | intron   | 0.363636364 | G | A |
| RARG        | chr12 | 53615511  | intron   | 0.363636364 | T | C |
| AKAP13      | chr15 | 86284342  | codeexon | 0.363636364 | C | T |
| AKAP13      | chr15 | 86284363  | codeexon | 0.363636364 | G | A |
| NUDT7       | chr16 | 77775459  | intron   | 0.363636364 | G | A |
| SIRPB1      | chr20 | 1592215   | codeexon | 0.363636364 | C | G |
| TPST2       | chr22 | 26972828  | intron   | 0.363636364 | G | A |
| RASGRF2     | chr5  | 80419349  | intron   | 0.363636364 | C | G |
| RTN4IP1     | chr6  | 107036909 | intron   | 0.363636364 | C | T |
| FBXL18      | chr7  | 5547624   | intron   | 0.363636364 | A | G |
| SFRP1       | chr8  | 41152752  | intron   | 0.363636364 | T | C |
| CDK5RAP2    | chr9  | 123171656 | intron   | 0.363636364 | A | G |
| KIAA1217    | chr10 | 24810603  | intron   | 0.36        | C | T |
| AK000451    | chr9  | 66524429  | intron   | 0.36        | C | T |
| AK309896    | chr9  | 66524429  | intron   | 0.36        | C | T |
| GALNT18     | chr11 | 11354346  | codeexon | 0.357142857 | T | C |
| LOH12CR1    | chr12 | 12605279  | intron   | 0.357142857 | G | T |
| LOH12CR1    | chr12 | 12605305  | intron   | 0.357142857 | T | C |
| LOH12CR1    | chr12 | 12605311  | intron   | 0.357142857 | A | G |
| KRT6A       | chr12 | 52885190  | intron   | 0.357142857 | C | T |
| HERC2P2     | chr15 | 23378091  | intron   | 0.357142857 | G | A |
| MYH1        | chr17 | 10404118  | intron   | 0.357142857 | A | G |
| WNT9B       | chr17 | 44929325  | intron   | 0.357142857 | C | A |
| QPCT        | chr2  | 37587040  | intron   | 0.357142857 | C | A |
| LOC401127   | chr4  | 39482684  | 3utr     | 0.357142857 | A | C |
| ITGA2       | chr5  | 52368922  | intron   | 0.357142857 | T | A |
| COL6A2      | chr21 | 47517869  | up1000   | 0.352941176 | A | T |
| CD302       | chr2  | 160654524 | intron   | 0.351851852 | G | T |
| LY75-CD302  | chr2  | 160654524 | intron   | 0.351851852 | G | T |
| AK9         | chr6  | 109909422 | intron   | 0.35        | C | T |
| TPM3P9      | chr19 | 53945701  | 3utr     | 0.346153846 | C | T |
| LINC00668   | chr18 | 6927348   | 5utr     | 0.34375     | G | A |
| LINC00668   | chr18 | 6927352   | 5utr     | 0.34375     | T | C |
| LINC00668   | chr18 | 6927353   | 5utr     | 0.34375     | G | A |
| PTPRD       | chr9  | 8319806   | intron   | 0.34375     | C | T |
| AP4E1       | chr15 | 51233812  | intron   | 0.342857143 | T | C |
| BC171896    | chr1  | 214656740 | 5utr     | 0.342105263 | A | G |
| SLC18A3     | chr10 | 50818595  | 5utr     | 0.338028169 | C | T |
| TMX2-CTNND1 | chr11 | 57483989  | intron   | 0.333333333 | C | T |

|           |       |           |          |             |   |   |
|-----------|-------|-----------|----------|-------------|---|---|
| TMX2      | chr11 | 57483989  | intron   | 0.333333333 | C | T |
| RARG      | chr12 | 53615513  | intron   | 0.333333333 | C | G |
| ITGBL1    | chr13 | 102305556 | intron   | 0.333333333 | A | G |
| HNRNPA1L2 | chr13 | 53217408  | codeexon | 0.333333333 | A | G |
| ZNF814    | chr19 | 58385748  | codeexon | 0.333333333 | G | A |
| ZNF417    | chr19 | 58419874  | 3utr     | 0.333333333 | T | C |
| TUBA3FP   | chr22 | 21363240  | 5utr     | 0.333333333 | C | T |
| SGOL1-AS1 | chr3  | 20219885  | intron   | 0.333333333 | C | T |
| SGOL1     | chr3  | 20219885  | intron   | 0.333333333 | C | T |
| DDX60L    | chr4  | 169312801 | intron   | 0.333333333 | A | G |
| C4orf47   | chr4  | 186357504 | codeexon | 0.333333333 | A | G |
| NKAIN2    | chr6  | 125139473 | intron   | 0.333333333 | T | G |
| CMAHP     | chr6  | 25108923  | codeexon | 0.333333333 | A | G |
| MDN1      | chr6  | 90402840  | codeexon | 0.326086957 | C | G |
| 9-Mar     | chr12 | 58149253  | 5utr     | 0.322580645 | T | C |
| OR5H6     | chr3  | 97983981  | codeexon | 0.318181818 | G | A |
| LARS      | chr5  | 145547294 | intron   | 0.318181818 | A | G |
| NBPF1     | chr1  | 16913101  | intron   | 0.315789474 | C | G |
| FGF6      | chr12 | 4543361   | 3utr     | 0.315789474 | G | A |
| CDC34     | chr19 | 531157    | up1000   | 0.315789474 | G | C |
| SAMD10    | chr20 | 62609766  | intron   | 0.314285714 | C | T |
| ESPNP     | chr1  | 17020048  | intron   | 0.3125      | A | G |
| ABHD17A   | chr19 | 1881418   | codeexon | 0.3125      | C | T |
| IGSF10    | chr3  | 151158265 | intron   | 0.3125      | G | A |
| NKAIN2    | chr6  | 125139474 | intron   | 0.3125      | G | C |
| COL19A1   | chr6  | 70878198  | intron   | 0.3125      | C | T |
| DNAJB6    | chr7  | 157151376 | intron   | 0.3125      | A | G |
| BAGE3     | chr21 | 11022938  | intron   | 0.307692308 | C | T |
| TPTE      | chr21 | 11022938  | intron   | 0.307692308 | C | T |
| BAGE3     | chr21 | 11096418  | intron   | 0.307692308 | A | G |
| BAGE      | chr21 | 11096418  | intron   | 0.307692308 | A | G |
| AX747174  | chr6  | 39851679  | 3utr     | 0.307692308 | A | G |
| AZGP1P1   | chr7  | 99578381  | up1000   | 0.307692308 | T | C |
| SEH1L     | chr18 | 12980604  | intron   | 0.304347826 | C | T |
| CLIP4     | chr2  | 29356669  | codeexon | 0.304347826 | A | G |
| FLG       | chr1  | 152279019 | codeexon | 0.3         | G | A |
| PKD1L2    | chr16 | 81180995  | 5utr     | 0.3         | T | C |
| DNAJC25-  |       |           |          |             |   |   |
| GNG10     | chr9  | 114403993 | intron   | 0.3         | G | A |
| DNAJC25   | chr9  | 114403993 | intron   | 0.3         | G | A |
| PVRL3     | chr3  | 110793050 | intron   | 0.297297297 | G | A |
| FANK1     | chr10 | 127684240 | intron   | 0.294117647 | A | G |
| abParts   | chr16 | 32936350  | intron   | 0.294117647 | G | A |
| OR5P2     | chr11 | 7818190   | codeexon | 0.291666667 | C | T |

|          |       |           |          |             |   |   |
|----------|-------|-----------|----------|-------------|---|---|
| ROCK1P1  | chr18 | 109351    | 3utr     | 0.291666667 | G | A |
| MIR1304  | chr11 | 93466858  | 5utr     | 0.285714286 | G | C |
| TAF1D    | chr11 | 93466858  | 5utr     | 0.285714286 | G | C |
| EIF2AK4  | chr15 | 40285120  | intron   | 0.285714286 | A | G |
| KIAA0430 | chr16 | 15724113  | intron   | 0.285714286 | C | T |
| ABCA5    | chr17 | 67304447  | codeexon | 0.285714286 | C | T |
| SPON2    | chr4  | 1188738   | intron   | 0.285714286 | T | C |
| PPP1R9A  | chr7  | 94898811  | codeexon | 0.285714286 | G | A |
| AK098438 | chr1  | 21754627  | up1000   | 0.277777778 | G | A |
| AK023040 | chr19 | 23445196  | intron   | 0.277777778 | T | C |
| GZMK     | chr5  | 54320700  | intron   | 0.277777778 | C | T |
| ANKRD12  | chr18 | 9275542   | codeexon | 0.272727273 | C | T |
| TADA1    | chr1  | 166826773 | 3utr     | 0.269230769 | C | T |
| FLG      | chr1  | 152280471 | codeexon | 0.266666667 | C | G |
| CHGA     | chr14 | 93397545  | intron   | 0.266666667 | C | G |
| ATP2B2   | chr3  | 10413715  | codeexon | 0.266666667 | G | A |
| SPON2    | chr4  | 1188750   | intron   | 0.266666667 | A | G |
| PRPH2    | chr6  | 42672416  | intron   | 0.266666667 | A | T |
| SLCO2B1  | chr11 | 74862356  | 5utr     | 0.263157895 | T | C |
| PLEKHA5  | chr12 | 19501256  | intron   | 0.263157895 | T | C |
| PCDHGA1  | chr5  | 140710810 | codeexon | 0.263157895 | G | A |
| CR936796 | chr1  | 142688999 | intron   | 0.261904762 | T | A |
| SRBD1    | chr2  | 45829286  | intron   | 0.260869565 | A | C |
| ESR1     | chr6  | 152220185 | intron   | 0.259259259 | G | T |
| BC016143 | chr1  | 27391101  | intron   | 0.258064516 | C | T |
| YAF2     | chr12 | 42621933  | intron   | 0.25        | C | T |
| C3AR1    | chr12 | 8211826   | codeexon | 0.25        | T | C |
| SCNN1G   | chr16 | 23223456  | codeexon | 0.25        | G | T |
| TMPRSS9  | chr19 | 2418031   | codeexon | 0.25        | C | T |
| DPP10    | chr2  | 116594221 | intron   | 0.25        | G | C |
| HGSNAT   | chr8  | 43034584  | intron   | 0.24        | C | T |
| LLGL1    | chr17 | 18144720  | intron   | 0.238095238 | C | T |
| SLC38A6  | chr14 | 61482746  | intron   | 0.235294118 | G | A |
| SULT4A1  | chr22 | 44230931  | intron   | 0.235294118 | T | C |
| YAF2     | chr12 | 42621956  | intron   | 0.225       | G | A |
| GRIP1    | chr12 | 66957328  | intron   | 0.223684211 | G | C |
| KIAA0922 | chr4  | 154479430 | codeexon | 0.217391304 | T | C |
| PRPH2    | chr6  | 42672434  | intron   | 0.217391304 | C | T |
| TNPO3    | chr7  | 128607384 | codeexon | 0.214285714 | G | A |
| DQ583161 | chr4  | 49563467  | down1000 | 0.213114754 | T | C |
| DQ590589 | chr4  | 49563467  | down1000 | 0.213114754 | T | C |
| DEFB132  | chr20 | 238540    | intron   | 0.210526316 | C | T |
| ADAM33   | chr20 | 3649679   | intron   | 0.210526316 | G | T |
| IFT172   | chr2  | 27680649  | intron   | 0.210526316 | A | G |

|             |       |           |          |             |   |   |
|-------------|-------|-----------|----------|-------------|---|---|
| IL27RA      | chr19 | 14143434  | intron   | 0.208333333 | A | C |
| HBG2        | chr11 | 5573024   | intron   | 0.204081633 | A | G |
| MAN1B1      | chr9  | 139997294 | intron   | 0.202702703 | A | G |
| KRT3        | chr12 | 53189446  | codeexon | 0.2         | C | T |
| SNX29       | chr16 | 12297234  | intron   | 0.2         | A | G |
| PALM2-AKAP2 | chr9  | 112629858 | intron   | 0.2         | A | G |
| PALM2       | chr9  | 112629858 | intron   | 0.2         | A | G |
| COL18A1     | chr21 | 46930993  | intron   | 0.192307692 | C | A |
| SLC19A1     | chr21 | 46930993  | intron   | 0.192307692 | C | A |
| TRAF3       | chr14 | 103363623 | codeexon | 0.19047619  | T | A |
| KIRREL      | chr1  | 158020111 | intron   | 0.1875      | C | T |
| HS1BP3      | chr2  | 20824596  | codeexon | 0.1875      | C | A |
| DHX32       | chr10 | 127584619 | intron   | 0.181818182 | G | A |
| DHX32       | chr10 | 127584639 | intron   | 0.181818182 | G | T |
| NSUN6       | chr10 | 18898986  | intron   | 0.181818182 | A | C |
| RASAL2      | chr1  | 178063040 | 5utr     | 0.181818182 | G | A |
| RASAL2-AS1  | chr1  | 178063040 | 5utr     | 0.181818182 | G | A |
| LOC440300   | chr15 | 84860289  | up1000   | 0.181818182 | G | A |
| SF3B3       | chr16 | 70562724  | intron   | 0.181818182 | G | C |
| NBAS        | chr2  | 15701416  | codeexon | 0.181818182 | C | T |
| RRBP1       | chr20 | 17639846  | codeexon | 0.180722892 | T | G |
| SCPEP1      | chr17 | 55068388  | intron   | 0.178571429 | T | C |
| abParts     | chr22 | 22730619  | 3utr     | 0.176470588 | T | A |
| ESPNP       | chr1  | 17023509  | intron   | 0.175       | T | C |
| STARD5      | chr15 | 81605517  | 3utr     | 0.173913043 | C | T |
| HMGCLL1     | chr6  | 55406806  | intron   | 0.173913043 | C | T |
| AGAP11      | chr10 | 88768735  | codeexon | 0.166666667 | C | T |
| TMEM150B    | chr19 | 55831576  | intron   | 0.166666667 | A | C |
| TMEM150B    | chr19 | 55831577  | intron   | 0.166666667 | A | C |
| GALNT14     | chr2  | 31189248  | intron   | 0.166666667 | G | T |
| FRG1B       | chr20 | 29612923  | intron   | 0.161290323 | C | T |
| EEF2        | chr19 | 3979340   | codeexon | 0.16        | C | T |
| SLC13A1     | chr7  | 122808598 | codeexon | 0.157894737 | C | T |
| C17orf80    | chr17 | 71232464  | codeexon | 0.156862745 | C | G |
| NBPF1       | chr1  | 16907164  | intron   | 0.15625     | C | T |
| GPHN        | chr14 | 67647600  | codeexon | 0.153846154 | C | T |
| NFKBID      | chr19 | 36381388  | codeexon | 0.153846154 | A | G |
| GTPBP2      | chr6  | 43594559  | intron   | 0.151515152 | T | C |
| DLEC1       | chr3  | 38101313  | codeexon | 0.148148148 | G | T |
| TBX22       | chrX  | 79286112  | codeexon | 0.148148148 | T | C |
| DNM1P41     | chr15 | 85046602  | codeexon | 0.147540984 | C | A |
| RRBP1       | chr20 | 17639850  | codeexon | 0.144736842 | C | T |
| GAD2        | chr10 | 26562588  | codeexon | 0.142857143 | G | T |
| PTPRN2      | chr7  | 157633095 | intron   | 0.138461538 | T | C |

|          |       |           |          |             |   |   |
|----------|-------|-----------|----------|-------------|---|---|
| DOCK1    | chr10 | 129160333 | codeexon | 0.137931034 | C | G |
| BC080605 | chr9  | 68415196  | down1000 | 0.134831461 | C | T |
| PRIM2    | chr6  | 57254955  | intron   | 0.134615385 | G | A |
| CEP192   | chr18 | 13019051  | intron   | 0.133333333 | C | A |
| ASPDH    | chr19 | 51016976  | intron   | 0.133333333 | G | A |
| AGXT2L1  | chr4  | 109672180 | intron   | 0.133333333 | C | T |
| SNAPC4   | chr9  | 139276405 | codeexon | 0.133333333 | G | A |
| RFX3     | chr9  | 3277297   | intron   | 0.133333333 | C | A |
| DSPP     | chr4  | 88537306  | codeexon | 0.129032258 | T | C |
| OTOA     | chr16 | 21747662  | codeexon | 0.128205128 | G | A |
| CYP2C9   | chr10 | 96748863  | 3utr     | 0.125       | A | T |
| AXDND1   | chr1  | 179418193 | intron   | 0.12195122  | T | G |
| NEK4     | chr3  | 52773401  | intron   | 0.12195122  | T | C |
| CELA3A   | chr1  | 22332008  | codeexon | 0.119047619 | T | C |
| RTEL1    | chr20 | 62315767  | intron   | 0.119047619 | C | T |
| RTEL1-   |       |           |          |             |   |   |
| TNFRSF6B | chr20 | 62315767  | intron   | 0.119047619 | C | T |
| CTNNB1   | chr3  | 41266477  | codeexon | 0.117647059 | C | T |
| AIM1L    | chr1  | 26671625  | codeexon | 0.112676056 | A | G |
| SEMA4A   | chr1  | 156127836 | intron   | 0.111111111 | C | T |
| SCNN1B   | chr16 | 23315398  | intron   | 0.111111111 | G | C |
| PER3     | chr1  | 7890053   | codeexon | 0.109090909 | G | A |
| MIA2     | chr14 | 39722420  | codeexon | 0.108108108 | G | T |
| MNT      | chr17 | 2291322   | codeexon | 0.108108108 | C | T |
| GINS4    | chr8  | 41399635  | 3utr     | 0.106060606 | A | G |
| MTMR4    | chr17 | 56583007  | intron   | 0.102564103 | A | G |

**Supplemental Table 2.** Genes associated with UV-induced SNV mutations at 72h after

UVR

| gene      | chromosome | position  | locations | frequency    | control | UV-72h |
|-----------|------------|-----------|-----------|--------------|---------|--------|
| ZNF324    | chr19      | 58978517  | 5utr      | 0.8333333333 | G       | A      |
| CNFN      | chr19      | 42893236  | intron    | 0.642857143  | T       | C      |
| JAG2      | chr14      | 105614974 | intron    | 0.615384615  | T       | C      |
| LOC731275 | chr1       | 243262157 | intron    | 0.6          | C       | T      |
| RHBDL3    | chr17      | 30646333  | intron    | 0.6          | G       | C      |
| CUX1      | chr7       | 101608918 | intron    | 0.6          | G       | A      |
| DLC1      | chr8       | 13312149  | intron    | 0.6          | C       | T      |
| SLC35F3   | chr1       | 234202553 | intron    | 0.5833333333 | C       | G      |
| TMCC3     | chr12      | 95034773  | intron    | 0.571428571  | T       | C      |
| DIRC3     | chr2       | 218430506 | intron    | 0.571428571  | T       | G      |
| PFKP      | chr10      | 3162033   | intron    | 0.555555556  | T       | C      |
| SCARB1    | chr12      | 125325521 | intron    | 0.555555556  | C       | A      |
| ZNF365    | chr10      | 64163201  | intron    | 0.545454545  | A       | G      |
| AK125737  | chr1       | 17200127  | intron    | 0.545454545  | G       | C      |
| CROCC     | chr1       | 17200127  | intron    | 0.545454545  | G       | C      |
| OBSCN     | chr1       | 228538829 | intron    | 0.545454545  | C       | T      |
| NXN       | chr17      | 834175    | intron    | 0.545454545  | C       | G      |
| ANK2      | chr4       | 114037858 | intron    | 0.545454545  | A       | G      |
| DQ588973  | chr15      | 31089893  | up1000    | 0.538461538  | T       | A      |
| PSMD1     | chr2       | 231940362 | intron    | 0.5333333333 | C       | T      |
| PRR5-     |            |           |           |              |         |        |
| ARHGAP8   | chr22      | 45128232  | codeexon  | 0.529411765  | T       | C      |
| PRR5      | chr22      | 45128232  | codeexon  | 0.529411765  | T       | C      |
| DL492607  | chr11      | 113660576 | 3utr      | 0.5          | A       | G      |
| SIK3      | chr11      | 116875152 | intron    | 0.5          | A       | G      |
| DCAF6     | chr1       | 167988529 | intron    | 0.5          | A       | G      |
| DYNLL1    | chr12      | 120927826 | intron    | 0.5          | C       | T      |
| ITPR2     | chr12      | 26644144  | intron    | 0.5          | T       | C      |
| JMJD4     | chr1       | 227920103 | codeexon  | 0.5          | G       | A      |
| DBX2      | chr12      | 45444238  | intron    | 0.5          | T       | A      |
| AK092087  | chr15      | 35046816  | up1000    | 0.5          | T       | A      |
| GJD2      | chr15      | 35046816  | up1000    | 0.5          | T       | A      |
| MIR3180-3 | chr16      | 18495263  | down1000  | 0.5          | G       | A      |
| MYH1      | chr17      | 10404118  | intron    | 0.5          | A       | G      |
| RNF112    | chr17      | 19319374  | codeexon  | 0.5          | T       | C      |
| CAMTA1    | chr1       | 7369470   | intron    | 0.5          | G       | T      |
| C17orf64  | chr17      | 58503732  | intron    | 0.5          | A       | C      |
| IMPACT    | chr18      | 22008913  | intron    | 0.5          | C       | T      |

|           |       |           |          |             |   |   |
|-----------|-------|-----------|----------|-------------|---|---|
| COL5A3    | chr19 | 10120887  | intron   | 0.5         | C | G |
| DPYD-AS1  | chr1  | 97694535  | intron   | 0.5         | C | T |
| DPYD      | chr1  | 97694535  | intron   | 0.5         | C | T |
| CYP24A1   | chr20 | 52789743  | intron   | 0.5         | C | G |
| GRIK1     | chr21 | 31045511  | intron   | 0.5         | T | C |
| FBXW4P1   | chr22 | 23605114  | 5utr     | 0.5         | C | A |
| SERPINE2  | chr2  | 224900339 | intron   | 0.5         | G | T |
| TMEM71    | chr8  | 133769805 | intron   | 0.5         | T | G |
| MROH6     | chr8  | 144654594 | codeexon | 0.5         | G | T |
| ENTPD2    | chr9  | 139944689 | intron   | 0.5         | T | C |
| SLCO2B1   | chr11 | 74862356  | 5utr     | 0.473684211 | T | C |
| TMEM247   | chr2  | 46707886  | 3utr     | 0.473684211 | G | A |
| SAFB2     | chr19 | 5600370   | intron   | 0.466666667 | A | G |
| DDX11L9   | chr15 | 102520232 | up1000   | 0.461538462 | C | T |
| EMID1     | chr22 | 29651179  | intron   | 0.461538462 | T | C |
| IGSF10    | chr3  | 151158265 | intron   | 0.461538462 | G | A |
| PHYH      | chr10 | 13341900  | intron   | 0.454545455 | A | G |
| SYNRG     | chr17 | 35937637  | codeexon | 0.454545455 | T | C |
| DHDH      | chr19 | 49440261  | intron   | 0.454545455 | A | G |
| AK127963  | chr9  | 15069808  | intron   | 0.454545455 | A | G |
| OTUD6A    | chrX  | 69283668  | 3utr     | 0.451612903 | T | A |
| RNF8      | chr6  | 37348920  | intron   | 0.45        | C | T |
| PIK3C2A   | chr11 | 17123351  | intron   | 0.444444444 | C | T |
| TSPAN9    | chr12 | 3198652   | intron   | 0.444444444 | G | A |
| CTH       | chr1  | 70898646  | intron   | 0.444444444 | C | T |
| MGC72080  | chr7  | 97506517  | intron   | 0.444444444 | C | T |
| CCDC157   | chr22 | 30752942  | 5utr     | 0.434782609 | C | A |
| PAG1      | chr8  | 81905294  | intron   | 0.434782609 | G | A |
| TMPRSS3   | chr21 | 43805637  | codeexon | 0.433333333 | C | T |
| ELK4      | chr1  | 205595068 | intron   | 0.428571429 | A | G |
| SLC45A3   | chr1  | 205595068 | intron   | 0.428571429 | A | G |
| GPATCH1   | chr19 | 33572089  | 5utr     | 0.428571429 | G | C |
| TRAPPC12  | chr2  | 3482796   | intron   | 0.428571429 | T | G |
| ITGA1     | chr5  | 52223516  | intron   | 0.428571429 | C | A |
| AX746991  | chr6  | 3287118   | codeexon | 0.428571429 | T | C |
| SLC22A23  | chr6  | 3287118   | codeexon | 0.428571429 | T | C |
| MAN1B1    | chr9  | 139994102 | intron   | 0.423076923 | G | A |
| CDC16     | chr13 | 115000650 | intron   | 0.421052632 | G | T |
| CSPG4     | chr15 | 75979782  | codeexon | 0.421052632 | G | T |
| FRAS1     | chr4  | 79305177  | intron   | 0.421052632 | T | G |
| FAM189A1  | chr15 | 29443949  | codeexon | 0.416666667 | A | G |
| LOC401127 | chr4  | 39482627  | 3utr     | 0.416666667 | T | C |
| INIP      | chr9  | 115454504 | intron   | 0.416666667 | C | A |
| FLG       | chr1  | 152280864 | codeexon | 0.4         | A | G |

|            |       |           |          |             |   |   |
|------------|-------|-----------|----------|-------------|---|---|
| BC043582   | chr13 | 24593519  | intron   | 0.4         | A | G |
| SPATA13    | chr13 | 24593519  | intron   | 0.4         | A | G |
| RCBTB2     | chr13 | 49096022  | intron   | 0.4         | T | C |
| ANPEP      | chr15 | 90342353  | intron   | 0.4         | G | A |
| UTS2       | chr1  | 7949897   | intron   | 0.4         | C | T |
| SLC44A2    | chr19 | 10718727  | intron   | 0.4         | C | T |
| ZNF101     | chr19 | 19782507  | intron   | 0.4         | A | C |
| NDUFA11    | chr19 | 5892568   | 3utr     | 0.4         | G | T |
| GDAP1L1    | chr20 | 42892250  | intron   | 0.4         | A | G |
| DPP10      | chr2  | 116424601 | intron   | 0.4         | C | A |
| BID        | chr22 | 18249905  | intron   | 0.4         | T | C |
| SGSM1      | chr22 | 25320371  | 3utr     | 0.4         | C | T |
| IQCA1      | chr2  | 237410998 | intron   | 0.4         | T | A |
| FLJ16124   | chr2  | 65790601  | intron   | 0.4         | G | A |
| LOC654342  | chr2  | 91824333  | intron   | 0.4         | G | A |
| ANK2       | chr4  | 114260538 | intron   | 0.4         | C | T |
| SLC12A7    | chr5  | 1065683   | intron   | 0.4         | A | C |
| TREML4     | chr6  | 41204094  | intron   | 0.4         | C | G |
| VAV2       | chr9  | 136654553 | 5utr     | 0.4         | A | C |
| CROCCP2    | chr1  | 16954895  | intron   | 0.391304348 | T | C |
| PTPRD      | chr9  | 8319806   | intron   | 0.391304348 | C | T |
| DQ572823   | chr15 | 74365031  | 3utr     | 0.388888889 | T | C |
| NPRL3      | chr16 | 136888    | intron   | 0.388888889 | T | C |
| ABCA5      | chr17 | 67304447  | codexon  | 0.388888889 | C | T |
| NRG3       | chr10 | 84442916  | intron   | 0.384615385 | G | A |
| NEGR1      | chr1  | 72722765  | intron   | 0.384615385 | G | T |
| KCNQ2      | chr20 | 62070160  | intron   | 0.384615385 | C | G |
| BV03S1J2.2 | chr7  | 142495126 | intron   | 0.384615385 | G | A |
| TCRVB      | chr7  | 142495126 | intron   | 0.384615385 | G | A |
| BV03S1J2.2 | chr7  | 142495127 | intron   | 0.384615385 | G | T |
| TCRVB      | chr7  | 142495127 | intron   | 0.384615385 | G | T |
| RNF123     | chr3  | 49728818  | intron   | 0.382352941 | G | C |
| LLGL1      | chr17 | 18144720  | intron   | 0.378378378 | C | T |
| PADI1      | chr1  | 17557039  | intron   | 0.375       | T | C |
| TUBA3FP    | chr22 | 21363240  | 5utr     | 0.375       | C | T |
| PPP6R2     | chr22 | 50824453  | intron   | 0.375       | T | C |
| RANBP17    | chr5  | 170288922 | 5utr     | 0.375       | A | G |
| ZNF596     | chr8  | 182972    | intron   | 0.371428571 | T | C |
| BAGE3      | chr21 | 11059877  | intron   | 0.368421053 | T | C |
| BAGE       | chr21 | 11059877  | intron   | 0.368421053 | T | C |
| SLC25A21   | chr14 | 37630167  | intron   | 0.363636364 | G | C |
| SERPINB8   | chr18 | 61656965  | down1000 | 0.363636364 | A | C |
| NUDT19     | chr19 | 33205614  | down1000 | 0.363636364 | C | T |
| DPP10      | chr2  | 116594221 | intron   | 0.363636364 | G | C |

|              |       |           |          |             |   |   |
|--------------|-------|-----------|----------|-------------|---|---|
| RCAN2        | chr6  | 46311223  | intron   | 0.363636364 | C | T |
| LOC100294362 | chr17 | 78388947  | 5utr     | 0.357142857 | G | T |
| AIM1         | chr6  | 107006583 | intron   | 0.357142857 | T | A |
| ARID3A       | chr19 | 968345    | intron   | 0.352941176 | C | T |
| ARID3A       | chr19 | 968346    | intron   | 0.352941176 | A | G |
| RBKS         | chr2  | 28006570  | intron   | 0.352941176 | C | T |
| BTNL9        | chr5  | 180486247 | codeexon | 0.352941176 | G | T |
| FRG1B        | chr20 | 29612933  | intron   | 0.351851852 | G | A |
| ALDH3B1      | chr11 | 67793509  | codeexon | 0.35        | C | T |
| MPHOSPH9     | chr12 | 123664438 | intron   | 0.35        | A | C |
| TRAP1        | chr16 | 3724465   | codeexon | 0.333333333 | G | C |
| ANKRD12      | chr18 | 9275542   | codeexon | 0.333333333 | C | T |
| HMHA1        | chr19 | 1078994   | intron   | 0.333333333 | A | G |
| TMPRSS9      | chr19 | 2418031   | codeexon | 0.333333333 | C | T |
| TTC27        | chr2  | 32865847  | intron   | 0.333333333 | C | T |
| CIDECF       | chr3  | 10059717  | 5utr     | 0.333333333 | G | A |
| FW339974     | chr3  | 10059717  | 5utr     | 0.333333333 | G | A |
| ATP2B2       | chr3  | 10413715  | codeexon | 0.333333333 | G | A |
| HSPBAP1      | chr3  | 122499441 | intron   | 0.333333333 | G | A |
| MAP6D1       | chr3  | 183535094 | 3utr     | 0.333333333 | C | T |
| CMTM7        | chr3  | 32439037  | intron   | 0.333333333 | T | C |
| KIAA1549     | chr7  | 138545946 | codeexon | 0.333333333 | C | T |
| NRP1         | chr10 | 33623251  | codeexon | 0.322580645 | G | A |
| FAM194B      | chr13 | 46137837  | codeexon | 0.322580645 | T | C |
| PVRL3        | chr3  | 110793050 | intron   | 0.322580645 | G | A |
| PKD1L2       | chr16 | 81180995  | 5utr     | 0.318181818 | T | C |
| REEP1        | chr2  | 86491245  | intron   | 0.318181818 | C | T |
| abParts      | chr14 | 106452817 | 5utr     | 0.315789474 | A | G |
| NCOA2        | chr8  | 71036977  | codeexon | 0.315789474 | T | C |
| L3MBTL3      | chr6  | 130341389 | intron   | 0.3125      | G | A |
| MAGI2        | chr7  | 77959737  | intron   | 0.3125      | A | C |
| COQ5         | chr12 | 120952308 | intron   | 0.307692308 | A | C |
| SFSWAP       | chr12 | 132267508 | intron   | 0.307692308 | C | G |
| GOLGA6L6     | chr15 | 20740192  | codeexon | 0.307692308 | G | A |
| RPTOR        | chr17 | 78583954  | intron   | 0.307692308 | G | C |
| GCGR         | chr17 | 79767602  | intron   | 0.307692308 | T | C |
| SH3D19       | chr4  | 152060547 | intron   | 0.307692308 | G | A |
| AGGF1        | chr5  | 76338690  | intron   | 0.307692308 | A | C |
| PLEKHA5      | chr12 | 19501256  | intron   | 0.302325581 | T | C |
| OR7A17       | chr19 | 14992042  | codeexon | 0.3         | A | G |
| ALDH16A1     | chr19 | 49964577  | intron   | 0.3         | G | T |
| BAGE3        | chr21 | 11059845  | intron   | 0.3         | C | T |
| BAGE         | chr21 | 11059845  | intron   | 0.3         | C | T |
| TPRXL        | chr3  | 14106310  | codeexon | 0.3         | T | C |

|           |       |           |          |             |   |   |
|-----------|-------|-----------|----------|-------------|---|---|
| TUBB2A    | chr6  | 3157809   | up1000   | 0.3         | C | T |
| EPHB3     | chr3  | 184295921 | intron   | 0.294117647 | C | T |
| SNX17     | chr2  | 27598097  | intron   | 0.291666667 | T | C |
| KIAA1217  | chr10 | 24783417  | intron   | 0.285714286 | C | G |
| TNPO3     | chr7  | 128607384 | codeexon | 0.285714286 | G | A |
| DYSF      | chr2  | 71908167  | codeexon | 0.28        | A | C |
| HPCAL1    | chr2  | 10539355  | intron   | 0.277777778 | C | T |
| AGXT2L2   | chr5  | 177659624 | 5utr     | 0.277777778 | C | A |
| LYZL2     | chr10 | 30915618  | intron   | 0.275       | G | A |
| OR7A17    | chr19 | 14992045  | codeexon | 0.275       | C | T |
| CCDC57    | chr17 | 80109038  | intron   | 0.272727273 | C | T |
| FADS6     | chr17 | 72877212  | codeexon | 0.266666667 | C | T |
| SLC2A5    | chr1  | 9107849   | intron   | 0.266666667 | G | T |
| MUC4      | chr3  | 195489468 | intron   | 0.266666667 | C | G |
| LPAL2     | chr6  | 160887626 | 5utr     | 0.266666667 | C | A |
| LCN9      | chr9  | 138556981 | intron   | 0.266666667 | C | T |
| IGFN1     | chr1  | 201179068 | codeexon | 0.256756757 | G | A |
| THEM4     | chr1  | 151862656 | 5utr     | 0.25        | T | C |
| CDC42BPB  | chr14 | 103440282 | intron   | 0.25        | G | T |
| DCAF13P3  | chr15 | 51238060  | 3utr     | 0.25        | A | G |
| PER1      | chr17 | 8052363   | intron   | 0.25        | T | C |
| ICAM4     | chr19 | 10398859  | codeexon | 0.25        | G | C |
| C2CD2     | chr21 | 43327856  | codeexon | 0.25        | A | G |
| KIAA0922  | chr4  | 154479430 | codeexon | 0.25        | T | C |
| LPAL2     | chr6  | 160887620 | 5utr     | 0.25        | C | T |
| GIGYF1    | chr7  | 100284593 | intron   | 0.25        | C | T |
| MED14     | chrX  | 40588602  | intron   | 0.25        | G | A |
| SNX29     | chr16 | 12297234  | intron   | 0.244444444 | A | G |
| HBG2      | chr11 | 5573024   | intron   | 0.24137931  | A | G |
| LINC00668 | chr18 | 6927352   | 5utr     | 0.24137931  | T | C |
| LINC00668 | chr18 | 6927353   | 5utr     | 0.24137931  | G | A |
| TLN2      | chr15 | 63047778  | codeexon | 0.24        | C | T |
| ALDH16A1  | chr19 | 49964584  | intron   | 0.238095238 | A | G |
| C3AR1     | chr12 | 8211826   | codeexon | 0.236363636 | T | C |
| PDE6C     | chr10 | 95388959  | intron   | 0.235294118 | T | C |
| DIDO1     | chr20 | 61514496  | intron   | 0.235294118 | G | A |
| MCM3AP    | chr21 | 47700939  | intron   | 0.235294118 | T | C |
| RTEL1     | chr20 | 62315770  | intron   | 0.234042553 | G | A |
| RTEL1-    |       |           |          |             |   |   |
| TNFRSF6B  | chr20 | 62315770  | intron   | 0.234042553 | G | A |
| PRPH2     | chr6  | 42672434  | intron   | 0.233333333 | C | T |
| FLG       | chr1  | 152284441 | codeexon | 0.227272727 | G | A |
| CELA3A    | chr1  | 22332008  | codeexon | 0.224489796 | T | C |
| PLAC9     | chr10 | 81892696  | intron   | 0.222222222 | C | G |

|           |       |           |          |             |   |   |
|-----------|-------|-----------|----------|-------------|---|---|
| LOC440300 | chr15 | 84860289  | up1000   | 0.222222222 | G | A |
| OTOA      | chr16 | 21747662  | codeexon | 0.21875     | G | A |
| PLIN4     | chr19 | 4512926   | codeexon | 0.21875     | T | C |
| CARD11    | chr7  | 2966505   | intron   | 0.217391304 | G | A |
| PHF2      | chr9  | 96439004  | codeexon | 0.217391304 | C | A |
| AP4E1     | chr15 | 51233812  | intron   | 0.216216216 | T | C |
| LINC00668 | chr18 | 6927348   | 5utr     | 0.214285714 | G | A |
| BC019904  | chr11 | 2398536   | intron   | 0.210526316 | G | C |
| BAGE3     | chr21 | 11023075  | intron   | 0.208333333 | G | A |
| TPTE      | chr21 | 11023075  | intron   | 0.208333333 | G | A |
| LOC23117  | chr16 | 21747777  | intron   | 0.20754717  | G | A |
| OTOA      | chr16 | 21747777  | intron   | 0.20754717  | G | A |
| CRTAC1    | chr10 | 99664341  | intron   | 0.2         | C | T |
| CASP9     | chr1  | 15850483  | intron   | 0.2         | G | A |
| ARHGAP5   | chr14 | 32561340  | codeexon | 0.2         | G | A |
| TCEB3B    | chr18 | 44560300  | codeexon | 0.2         | C | T |
| BRCA2     | chr13 | 32945023  | intron   | 0.192307692 | C | A |
| PRIM2     | chr6  | 57254955  | intron   | 0.191489362 | G | A |
| GZMK      | chr5  | 54320700  | intron   | 0.19047619  | C | T |
| PRPH2     | chr6  | 42672416  | intron   | 0.19047619  | A | T |
| C7orf76   | chr7  | 96113402  | intron   | 0.19047619  | C | T |
| NAV1      | chr1  | 201771084 | intron   | 0.185185185 | C | T |
| PLIN4     | chr19 | 4512933   | codeexon | 0.181818182 | C | A |
| SLC43A2   | chr17 | 1486380   | intron   | 0.173913043 | T | A |
| PNISR     | chr6  | 99860281  | intron   | 0.173913043 | C | A |
| KATNA1    | chr6  | 149925865 | codeexon | 0.170212766 | G | T |
| NBPF1     | chr1  | 16913101  | intron   | 0.166666667 | C | G |
| NUDC      | chr1  | 27272791  | 3utr     | 0.166666667 | G | C |
| MAN1B1    | chr9  | 139997955 | 5utr     | 0.166666667 | A | G |
| CNTNAP2   | chr7  | 148028756 | intron   | 0.162790698 | T | C |
| WRNIP1    | chr6  | 2785341   | codeexon | 0.161290323 | A | T |
| FAM166B   | chr9  | 35562130  | intron   | 0.161290323 | G | A |
| CRYBA2    | chr2  | 219855832 | intron   | 0.16        | A | T |
| ZNF491    | chr19 | 11915431  | 5utr     | 0.153846154 | G | A |
| MAN1B1    | chr9  | 139997061 | intron   | 0.153846154 | A | G |
| PCDHGA10  | chr5  | 140794674 | codeexon | 0.15        | A | G |
| ABHD17A   | chr19 | 1879995   | codeexon | 0.147727273 | C | T |
| GRIP1     | chr12 | 66957328  | intron   | 0.146067416 | G | C |
| TMEM54    | chr1  | 33360395  | 3utr     | 0.142857143 | G | T |
| MDN1      | chr6  | 90402840  | codeexon | 0.142857143 | C | G |
| KMT2C     | chr7  | 152077092 | intron   | 0.142857143 | C | T |
| TNRC18    | chr7  | 5354468   | intron   | 0.138888889 | C | T |
| RTF1      | chr15 | 41772426  | codeexon | 0.137931034 | T | C |
| SYNE1     | chr6  | 152720961 | intron   | 0.137931034 | A | T |

|          |       |           |          |             |   |   |
|----------|-------|-----------|----------|-------------|---|---|
| YME1L1   | chr10 | 27408467  | intron   | 0.135135135 | T | G |
| RNF214   | chr11 | 117105085 | codeexon | 0.133333333 | G | T |
| GALNT10  | chr5  | 153765954 | codeexon | 0.133333333 | G | A |
| MAN1B1   | chr9  | 139997184 | intron   | 0.130434783 | G | A |
| TTN      | chr2  | 179444921 | codeexon | 0.129032258 | C | G |
| MAN1B1   | chr9  | 139998127 | 5utr     | 0.125       | G | A |
| GBAS     | chr7  | 56049780  | intron   | 0.12195122  | A | G |
| SRCAP    | chr16 | 30723271  | codeexon | 0.117647059 | A | G |
| DAPK2    | chr15 | 64221825  | intron   | 0.11627907  | G | A |
| COL13A1  | chr10 | 71637648  | intron   | 0.111111111 | C | T |
| LARS     | chr5  | 145536953 | intron   | 0.108108108 | C | G |
| EIF1AY   | chrY  | 22741665  | intron   | 0.108108108 | T | C |
| ALPPL2   | chr2  | 233271687 | intron   | 0.105263158 | C | G |
| FRS2     | chr12 | 69967861  | codeexon | 0.102564103 | C | G |
| SLC35E2B | chr1  | 1601586   | codeexon | 0.1         | G | T |
| REN      | chr1  | 204131343 | intron   | 0.1         | A | T |
| ANKRD36  | chr2  | 97779611  | codeexon | 0.1         | A | G |

**Supplemental Table 3.** Genes associated with common mutations between 4h and 72h

| gene      | chro  | position  | location | UV-4h<br>frequency | UV-72h<br>frequency | con | UV-<br>4h/72h |
|-----------|-------|-----------|----------|--------------------|---------------------|-----|---------------|
| CDC16     | chr13 | 115000650 | intron   | 0.797752809        | 0.421052632         | G   | T             |
| KCNQ2     | chr20 | 62070160  | intron   | 0.714285714        | 0.384615385         | C   | G             |
| AGXT2L2   | chr5  | 177659624 | 5utr     | 0.64               | 0.277777778         | C   | A             |
| FLG       | chr1  | 152280864 | codeexon | 0.571428571        | 0.4                 | A   | G             |
| MAP6D1    | chr3  | 183535094 | 3utr     | 0.533333333        | 0.333333333         | C   | T             |
| JMJD4     | chr1  | 227920103 | codeexon | 0.5                | 0.5                 | G   | A             |
| DQ588973  | chr15 | 31089893  | up1000   | 0.5                | 0.538461538         | T   | A             |
| COL5A3    | chr19 | 10120887  | intron   | 0.5                | 0.5                 | C   | G             |
| RANBP17   | chr5  | 170288922 | 5utr     | 0.487179487        | 0.375               | A   | G             |
| RNF8      | chr6  | 37348920  | intron   | 0.466666667        | 0.45                | C   | T             |
| CSPG4     | chr15 | 75979782  | codeexon | 0.454545455        | 0.421052632         | G   | T             |
| ANK2      | chr4  | 114037858 | intron   | 0.454545455        | 0.545454545         | A   | G             |
| GIGYF1    | chr7  | 100284593 | intron   | 0.45               | 0.25                | C   | T             |
| BTNL9     | chr5  | 180486247 | codeexon | 0.432989691        | 0.352941176         | G   | T             |
| TLN2      | chr15 | 63047778  | codeexon | 0.421052632        | 0.24                | C   | T             |
| LOC401127 | chr4  | 39482627  | 3utr     | 0.411764706        | 0.416666667         | T   | C             |
| PADI1     | chr1  | 17557039  | intron   | 0.4                | 0.375               | T   | C             |
| FBXW4P1   | chr22 | 23605114  | 5utr     | 0.4                | 0.5                 | C   | A             |
| RCBTB2    | chr13 | 49096022  | intron   | 0.384615385        | 0.4                 | T   | C             |
| HSPBAP1   | chr3  | 122499441 | intron   | 0.384615385        | 0.333333333         | G   | A             |
| PLAC9     | chr10 | 81892696  | intron   | 0.381818182        | 0.222222222         | C   | G             |
| MYH1      | chr17 | 10404118  | intron   | 0.357142857        | 0.5                 | A   | G             |
| LINC00668 | chr18 | 6927348   | 5utr     | 0.34375            | 0.214285714         | G   | A             |
| LINC00668 | chr18 | 6927352   | 5utr     | 0.34375            | 0.24137931          | T   | C             |
| LINC00668 | chr18 | 6927353   | 5utr     | 0.34375            | 0.24137931          | G   | A             |
| PTPRD     | chr9  | 8319806   | intron   | 0.34375            | 0.391304348         | C   | T             |
| AP4E1     | chr15 | 51233812  | intron   | 0.342857143        | 0.216216216         | T   | C             |
| TUBA3FP   | chr22 | 21363240  | 5utr     | 0.333333333        | 0.375               | C   | T             |
| MDN1      | chr6  | 90402840  | codeexon | 0.326086957        | 0.142857143         | C   | G             |
| NBPF1     | chr1  | 16913101  | intron   | 0.315789474        | 0.166666667         | C   | G             |
| IGSF10    | chr3  | 151158265 | intron   | 0.3125             | 0.461538462         | G   | A             |
| PKD1L2    | chr16 | 81180995  | 5utr     | 0.3                | 0.318181818         | T   | C             |
| PVRL3     | chr3  | 110793050 | intron   | 0.297297297        | 0.322580645         | G   | A             |
| ABCA5     | chr17 | 67304447  | codeexon | 0.285714286        | 0.388888889         | C   | T             |
| GZMK      | chr5  | 54320700  | intron   | 0.277777778        | 0.19047619          | C   | T             |
| ANKRD12   | chr18 | 9275542   | codeexon | 0.272727273        | 0.333333333         | C   | T             |
| ATP2B2    | chr3  | 10413715  | codeexon | 0.266666667        | 0.333333333         | G   | A             |
| PRPH2     | chr6  | 42672416  | intron   | 0.266666667        | 0.19047619          | A   | T             |
| SLCO2B1   | chr11 | 74862356  | 5utr     | 0.263157895        | 0.473684211         | T   | C             |
| PLEKHA5   | chr12 | 19501256  | intron   | 0.263157895        | 0.302325581         | T   | C             |

|           |       |           |          |             |             |   |   |
|-----------|-------|-----------|----------|-------------|-------------|---|---|
| C3AR1     | chr12 | 8211826   | codeexon | 0.25        | 0.236363636 | T | C |
| TMPRSS9   | chr19 | 2418031   | codeexon | 0.25        | 0.333333333 | C | T |
| DPP10     | chr2  | 116594221 | intron   | 0.25        | 0.363636364 | G | C |
| LLGL1     | chr17 | 18144720  | intron   | 0.238095238 | 0.378378378 | C | T |
| GRIP1     | chr12 | 66957328  | intron   | 0.223684211 | 0.146067416 | G | C |
| KIAA0922  | chr4  | 154479430 | codeexon | 0.217391304 | 0.25        | T | C |
| PRPH2     | chr6  | 42672434  | intron   | 0.217391304 | 0.233333333 | C | T |
| TNPO3     | chr7  | 128607384 | codeexon | 0.214285714 | 0.285714286 | G | A |
| HBG2      | chr11 | 5573024   | intron   | 0.204081633 | 0.24137931  | A | G |
| SNX29     | chr16 | 12297234  | intron   | 0.2         | 0.244444444 | A | G |
| LOC440300 | chr15 | 84860289  | up1000   | 0.181818182 | 0.222222222 | G | A |
| PRIM2     | chr6  | 57254955  | intron   | 0.134615385 | 0.191489362 | G | A |
| OTOA      | chr16 | 21747662  | codeexon | 0.128205128 | 0.21875     | G | A |
| CELA3A    | chr1  | 22332008  | codeexon | 0.119047619 | 0.224489796 | T | C |

**Supplemental Table 4.** mRNA expression fold change (FC) of 17 histone acetyltransferases (HATs) genes and 18 histone deacetylase (HDACs) genes between UV-irradiated and control cells at 4h and 72h after UVR\*

| HATs   | FC-4h    | FC-72h   |  | HDACs  | FC-4h    | FC-72h   |
|--------|----------|----------|--|--------|----------|----------|
| CLOCK  | 0.380154 | 0.975132 |  | HDAC1  | 1.745747 | 1.146615 |
| CREBBP | 0.254765 | 0.965611 |  | HDAC10 | 1.186517 | 1.388792 |
| ELP3   | 0.703144 | 0.924651 |  | HDAC11 | 1.289983 | 1.258158 |
| EP300  | 0.249285 | 1.253902 |  | HDAC2  | 1.108064 | 0.82445  |
| GTF3C4 | 0.351086 | 0.974106 |  | HDAC3  | 1.346407 | 1.013469 |
| HAT1   | 1.282991 | 0.64893  |  | HDAC4  | 0.349709 | 0.930207 |
| KAT2A  | 1.395039 | 1.105061 |  | HDAC5  | 0.991799 | 1.225109 |
| KAT2B  | 0.992872 | 1.190393 |  | HDAC6  | 1.580243 | 1.144465 |
| KAT5   | 0.692566 | 0.992226 |  | HDAC7  | 0.40905  | 1.049525 |
| KAT6A  | 0.135632 | 0.703423 |  | HDAC8  | 1.17335  | 0.984343 |
| KAT6B  | 0.177553 | 0.967992 |  | HDAC9  | 0.164429 | 1.400943 |
| KAT7   | 0.381793 | 0.895522 |  | SIRT1  | 0.254074 | 0.795918 |
| KAT8   | 0.825946 | 0.84578  |  | SIRT2  | 1.677024 | 1.597928 |
| NCOA1  | 0.369598 | 0.960577 |  | SIRT3  | 1.141424 | 1.06829  |
| NCOA2  | 0.163467 | 1.13203  |  | SIRT4  | 1.089343 | 2.884615 |
| NCOA3  | 0.258231 | 1.210556 |  | SIRT5  | 1.194564 | 0.961301 |
| TAF1   | 0.425664 | 0.993698 |  | SIRT6  | 1.335281 | 1.235748 |
|        |          |          |  | SIRT7  | 1.569533 | 1.702355 |

\*Upregulated genes are highlighted in green. Down-regulated genes are highlighted in red.

**Supplemental Table 5.** UV-induced SNV profiles at 4h and 72h after UVR\*

| 4h after UVR |    | 72h after UVR |    |
|--------------|----|---------------|----|
| C_T          | 93 | C_T           | 78 |
| G_A          | 81 | G_A           | 70 |
| A_G          | 71 | T_C           | 61 |
| T_C          | 60 | A_G           | 60 |
| C_G          | 33 | G_T           | 30 |
| G_C          | 26 | C_G           | 28 |
| G_T          | 23 | A_C           | 23 |
| C_A          | 22 | C_A           | 20 |
| A_C          | 18 | G_C           | 17 |
| T_G          | 15 | T_A           | 12 |
| T_A          | 12 | T_G           | 9  |
| A_T          | 9  | A_T           | 8  |

\*Mapped sequencing reads from UVR-treated cells are normalized to sequencing reads from non-irradiated isogenic control cells to remove polymorphism.

**Supplemental Table 6. SCC tumor information**

| Patient ID | Tissue Block Id | Patient age | Gender | Race               | Pathology Class     | Tumor Type              | Tumor Stage | Surgical Site  |
|------------|-----------------|-------------|--------|--------------------|---------------------|-------------------------|-------------|----------------|
| 1          | 16689           | 76          | Male   | White/Non-hispanic | Normal              |                         |             | Upper mid back |
|            | 16690           | 76          | Male   | White/Non-hispanic | Malignant, invasive | Squamous cell carcinoma | II          | Upper mid back |
| 2          | 16691           | 76          | Male   | Decline response   | Normal              |                         |             | Oral Mucosa    |
|            | 16692           | 76          | Male   | Decline response   | Malignant, invasive | Squamous cell carcinoma | IVa         | Oral Mucosa    |
| 3          | 17131           | 72          | Female | White/Non-hispanic | Normal              |                         |             | Upper chest    |
|            | 17132           | 72          | Female | White/Non-hispanic | Malignant, invasive | Squamous cell carcinoma | II          | Upper chest    |
| 4          | 17133           | 58          | Male   | White/Non-hispanic | Normal              |                         |             | Scalp          |
|            | 17134           | 58          | Male   | White/Non-hispanic | Malignant, invasive | Squamous cell carcinoma | I           | Scalp          |
| 5          | 17135           | 82          | Male   | White/Non-hispanic | Normal              |                         |             | Temple         |
|            | 17136           | 82          | Male   | White/Non-hispanic | Malignant, invasive | Squamous cell carcinoma | II          | Temple         |
